# Supplementary material
Source: PubMed Central journal article supplement (PMC7396282)
Supplement: NIHMS1555972-supplement-520_2019_5277_MOESM1_ESM.pdf [file NIHMS1555972-supplement-520_2019_5277_MOESM1_ESM.pdf]

# SPARCCS Survey

Hello,

We are asking you to take part in a research study being done by Niharika Dixit, MD and Nancy Burke, PhD at the University of California, San Francisco.

Being in this study is optional.

If you choose to be in the study, you will be asked to complete a survey.

You are being asked to participate in this survey as you provide primary care to patients in the San Francisco Health Network.

This survey will help us learn more about the knowledge and attitudes of Primary Care Providers for care of cancer survivors.

Providing care to cancer survivors is challenging and the results of this survey will allow us to design interventions to assist primary care providers.

This survey should take about 20-30 minutes to complete.

The survey is anonymous, and no one will be able to link your answers back to you.

Please do not include your name or other information that could be used to identify you in the survey responses.

Questions? Please contact Niharika Dixit at [niharika.dixit@ucsf.edu](mailto:niharika.dixit@ucsf.edu), if you have questions or concerns about your rights as a research participant, you can call the UCSF Institutional Review Board at 415-476-1814.

If you want to participate in this study, click the link to start the survey.

Thank you,  
Niharika Dixit, MD and Nancy Burke, PhD

Survey date: \_\_\_\_\_

---

---

**I. PHYSICIAN PERSPECTIVES ON TREATMENT OF CANCER SURVIVORS**

**Please answer the following questions regardless of the actual number of BREAST or COLON CANCER SURVIVORS patients that you treat in your practice.**

**How confident do you feel about your knowledge of the following aspects of cancer-related follow-up care for BREAST CANCER SURVIVORS?**

|                                                                            | Not at all            | Somewhat confident    | Very confident        | Don't know            |
|----------------------------------------------------------------------------|-----------------------|-----------------------|-----------------------|-----------------------|
| Appropriate surveillance testing to detect recurrent cancer                | <input type="radio"/> | <input type="radio"/> | <input type="radio"/> | <input type="radio"/> |
| Long-term and late physical adverse effects of cancer and cancer treatment | <input type="radio"/> | <input type="radio"/> | <input type="radio"/> | <input type="radio"/> |
| The potential adverse psychosocial outcomes of cancer or its treatment     | <input type="radio"/> | <input type="radio"/> | <input type="radio"/> | <input type="radio"/> |

---

---

**How confident do you feel about your knowledge of the following aspects of cancer-related follow-up care for COLON CANCER survivors?**

|                                                                            | Not at all            | Somewhat confident    | Very confident        | Don't know            |
|----------------------------------------------------------------------------|-----------------------|-----------------------|-----------------------|-----------------------|
| Appropriate surveillance testing to detect recurrent cancer                | <input type="radio"/> | <input type="radio"/> | <input type="radio"/> | <input type="radio"/> |
| Long-term and late physical adverse effects of cancer and cancer treatment | <input type="radio"/> | <input type="radio"/> | <input type="radio"/> | <input type="radio"/> |
| The potential adverse psychosocial outcomes of cancer or its treatment     | <input type="radio"/> | <input type="radio"/> | <input type="radio"/> | <input type="radio"/> |

**How often do you believe the following cancer surveillance tests should be performed for a BREAST CANCER SURVIVOR with the following characteristics:**

- 55 year-old woman**
- Status post adjuvant chemotherapy for early stage BREAST CANCER 4 YEARS AGO**
- Currently asymptomatic**
- No evident disease**
- No significant co-morbidities**
- Not on endocrine therapy for her cancer**

|                                                  | Every 3-4 months      | Every 6 months        | Yearly                | Only if Indicated due to symptoms | Never                 | Other                 | Don't Know            |
|--------------------------------------------------|-----------------------|-----------------------|-----------------------|-----------------------------------|-----------------------|-----------------------|-----------------------|
| Liver function tests                             | <input type="radio"/> | <input type="radio"/> | <input type="radio"/> | <input type="radio"/>             | <input type="radio"/> | <input type="radio"/> | <input type="radio"/> |
| Serum tumor markers (e.g., CA-125, CA 15-3, CEA) | <input type="radio"/> | <input type="radio"/> | <input type="radio"/> | <input type="radio"/>             | <input type="radio"/> | <input type="radio"/> | <input type="radio"/> |
| Mammogram                                        | <input type="radio"/> | <input type="radio"/> | <input type="radio"/> | <input type="radio"/>             | <input type="radio"/> | <input type="radio"/> | <input type="radio"/> |
| MRI                                              | <input type="radio"/> | <input type="radio"/> | <input type="radio"/> | <input type="radio"/>             | <input type="radio"/> | <input type="radio"/> | <input type="radio"/> |
| Complete blood count                             | <input type="radio"/> | <input type="radio"/> | <input type="radio"/> | <input type="radio"/>             | <input type="radio"/> | <input type="radio"/> | <input type="radio"/> |
| Chest X-Ray                                      | <input type="radio"/> | <input type="radio"/> | <input type="radio"/> | <input type="radio"/>             | <input type="radio"/> | <input type="radio"/> | <input type="radio"/> |
| Bone Scan                                        | <input type="radio"/> | <input type="radio"/> | <input type="radio"/> | <input type="radio"/>             | <input type="radio"/> | <input type="radio"/> | <input type="radio"/> |
| CT Scan                                          | <input type="radio"/> | <input type="radio"/> | <input type="radio"/> | <input type="radio"/>             | <input type="radio"/> | <input type="radio"/> | <input type="radio"/> |
| PET Scan                                         | <input type="radio"/> | <input type="radio"/> | <input type="radio"/> | <input type="radio"/>             | <input type="radio"/> | <input type="radio"/> | <input type="radio"/> |

Liver function test- other \_\_\_\_\_

Serum tumor markers- other \_\_\_\_\_

Mammogram- other \_\_\_\_\_

MRI- other \_\_\_\_\_

CBC- other \_\_\_\_\_

Xray- other \_\_\_\_\_

Bone scan- other \_\_\_\_\_

CT scan- other \_\_\_\_\_

PET scan- other \_\_\_\_\_

**How often do you believe the following cancer surveillance tests should be performed for a COLON CANCER SURVIVOR with the following characteristics:**

**-55 year-old woman**

**-Status post adjuvant chemotherapy for stage 3 COLON CANCER 4 YEARS AGO**

**-Currently asymptomatic**

**-No evident disease**

**-No significant co-morbidities**

|                                                 | Every 3-4 months      | Every 6 months        | Yearly                | Only if indicated due to symptoms | Never                 | Other                 | Don't Know            |
|-------------------------------------------------|-----------------------|-----------------------|-----------------------|-----------------------------------|-----------------------|-----------------------|-----------------------|
| How often should the physical exam be done      | <input type="radio"/> | <input type="radio"/> | <input type="radio"/> | <input type="radio"/>             | <input type="radio"/> | <input type="radio"/> | <input type="radio"/> |
| CBC                                             | <input type="radio"/> | <input type="radio"/> | <input type="radio"/> | <input type="radio"/>             | <input type="radio"/> | <input type="radio"/> | <input type="radio"/> |
| Liver function tests                            | <input type="radio"/> | <input type="radio"/> | <input type="radio"/> | <input type="radio"/>             | <input type="radio"/> | <input type="radio"/> | <input type="radio"/> |
| Serum tumor markers (e.g., CA-125,CA 15-3, CEA) | <input type="radio"/> | <input type="radio"/> | <input type="radio"/> | <input type="radio"/>             | <input type="radio"/> | <input type="radio"/> | <input type="radio"/> |
| Colonoscopy                                     | <input type="radio"/> | <input type="radio"/> | <input type="radio"/> | <input type="radio"/>             | <input type="radio"/> | <input type="radio"/> | <input type="radio"/> |
| FOBT                                            | <input type="radio"/> | <input type="radio"/> | <input type="radio"/> | <input type="radio"/>             | <input type="radio"/> | <input type="radio"/> | <input type="radio"/> |
| Chest X-ray                                     | <input type="radio"/> | <input type="radio"/> | <input type="radio"/> | <input type="radio"/>             | <input type="radio"/> | <input type="radio"/> | <input type="radio"/> |
| CT Scan                                         | <input type="radio"/> | <input type="radio"/> | <input type="radio"/> | <input type="radio"/>             | <input type="radio"/> | <input type="radio"/> | <input type="radio"/> |
| PET scan                                        | <input type="radio"/> | <input type="radio"/> | <input type="radio"/> | <input type="radio"/>             | <input type="radio"/> | <input type="radio"/> | <input type="radio"/> |

How often should the physical exam be done-other

\_\_\_\_\_

CBC- other

\_\_\_\_\_

Liver function test- other

\_\_\_\_\_

Serum tumor markers- other

\_\_\_\_\_

Colonoscopy- other

\_\_\_\_\_

FOBT- other

\_\_\_\_\_

CT scan- other

\_\_\_\_\_

Xray- other

\_\_\_\_\_

PET scan- other

\_\_\_\_\_

---

---

**I believe there are conflicting recommendations regarding the appropriate management of cancer survivors who have completed active treatment for early stage...**

|               | Strongly disagree     | Somewhat disagree     | Somewhat agree        | Strongly agree        | Don't know            |
|---------------|-----------------------|-----------------------|-----------------------|-----------------------|-----------------------|
| Breast cancer | <input type="radio"/> |
| Colon cancer  | <input type="radio"/> |

---

---

**To what extent do you agree or disagree with the following statements regarding patients who have already completed active treatment for early stage BREAST CANCER.**

|                                                                                                                                                       | Strongly disagree     | Somewhat disagree     | Somewhat agree        | Strongly agree        | Don't know            |
|-------------------------------------------------------------------------------------------------------------------------------------------------------|-----------------------|-----------------------|-----------------------|-----------------------|-----------------------|
| Primary Care Physicians (PCPs) have the knowledge necessary to provide follow-up care related to the effects of cancer or its treatment for survivors | <input type="radio"/> |
| PCPs have the knowledge necessary to initiate appropriate screening or diagnostic work-up to detect recurrent cancer, for survivors                   | <input type="radio"/> |
| PCPs should have primary responsibility for providing cancer-related follow up care for survivors                                                     | <input type="radio"/> |
| PCPs are better able than Oncologists to provide psychosocial support for survivors                                                                   | <input type="radio"/> |

---

---

**To what extent do you agree or disagree with the following statements regarding patients who have already completed active treatment for early stage COLON CANCER.**

|                                                                                                                                     | Strongly disagree     | Somewhat disagree     | Somewhat agree        | Strongly agree        | Don't know            |
|-------------------------------------------------------------------------------------------------------------------------------------|-----------------------|-----------------------|-----------------------|-----------------------|-----------------------|
| PCPs have the knowledge necessary to provide follow-up care related to the effects of cancer or its treatment for survivors         | <input type="radio"/> |
| PCPs have the knowledge necessary to initiate appropriate screening or diagnostic work-up to detect recurrent cancer, for survivors | <input type="radio"/> |
| PCPs should have primary responsibility for providing cancer-related follow up care for survivors                                   | <input type="radio"/> |
| PCPs are better able than Oncologists to provide psycho-social support for survivors                                                | <input type="radio"/> |



---

---

**Please estimate how many patients ever diagnosed with BREAST or COLON CANCER you cared for in the LAST 12 MONTHS? Include recently diagnosed as well as longer term survivors.**

Breast cancer

\_\_\_\_\_

Colon cancer

\_\_\_\_\_

---

**Thinking about how you deliver cancer-related follow up care for BREAST or COLON CANCER SURVIVORS,  
how often do you:**

|                                                                                                                                    | Never                 | Rarely                | Sometimes             | Often                 | Always/Almost Always  | NA                    |
|------------------------------------------------------------------------------------------------------------------------------------|-----------------------|-----------------------|-----------------------|-----------------------|-----------------------|-----------------------|
| Receive a comprehensive summary including cancer treatment information from the patient's oncology specialist                      | <input type="radio"/> |
| Provide a summary of the patient's past non-cancer medical history for the patient's oncology specialist                           | <input type="radio"/> |
| Receive information from the oncology specialist in a timely manner                                                                | <input type="radio"/> |
| Experience difficulties transferring patient care responsibilities between you and the oncology specialist                         | <input type="radio"/> |
| Receive from the patient's oncologist an explicit follow-up care plan documenting recommendations for future care and surveillance | <input type="radio"/> |
| Have a specific discussion with the patient regarding recommendation for future care and surveillance                              | <input type="radio"/> |

---

---

**For patients who are within 5 years of completing active treatment for early stage BREAST or COLON CANCER, how is each component of care listed below usually delivered in your practice?**

Counseling on diet and physical activity

- I order or provide this service myself
- The oncology specialist orders or provides this service
- The oncology specialist and I share responsibility
- Another specialist orders or provides this service
- I am not involved in this care

Counseling on smoking cessation

- I order or provide this service myself
- The oncology specialist orders or provides this service
- The oncology specialist and I share responsibility
- Another specialist orders or provides this service
- I am not involved in this care

Treating pain related to cancer treatment

- I order or provide this service myself
- The oncology specialist orders or provides this service
- The oncology specialist and I share responsibility
- Another specialist orders or provides this service
- I am not involved in this care

Treating fatigue

- I order or provide this service myself
- The oncology specialist orders or provides this service
- The oncology specialist and I share responsibility
- Another specialist orders or provides this service
- I am not involved in this care

Treating sexual dysfunction

- I order or provide this service myself
- The oncology specialist orders or provides this service
- The oncology specialist and I share responsibility
- Another specialist orders or provides this service
- I am not involved in this care

Managing adverse late or long-term outcomes of breast cancer treatment

- I order or provide this service myself
- The oncology specialist orders or provides this service
- The oncology specialist and I share responsibility
- Another specialist orders or provides this service
- I am not involved in this care

---



---

**Thinking of patients who have completed active treatment for early stage BREAST or COLON CANCER,**
**How often do you routinely...**

|                                                                                                              | Never                 | Rarely                | Sometimes             | Often                 | Always/Almost Always  | Don't know            |
|--------------------------------------------------------------------------------------------------------------|-----------------------|-----------------------|-----------------------|-----------------------|-----------------------|-----------------------|
| Discuss with your patient which physician will follow them for their cancer                                  | <input type="radio"/> |
| Communicate with your patients' other physician(s) about which physician will follow them for their cancer   | <input type="radio"/> |
| Discuss with your patient which physician will handle any other medical issues                               | <input type="radio"/> |
| Communicate with your patients' other physician(s) about which physician(s) will handle other medical issues | <input type="radio"/> |

---

---

**Cancer treatments often have side effects that may result in morbidity or premature mortality. These adverse effects of cancer treatment can be classified as late or long-term. Which of the following adverse effects have you observed (or seen reported) most often with use of the following cancer drugs?**

|                          | Peripheral neuropathy | Pulmonary fibrosis    | Cardiac dysfunction   | Premature menopause   | Secondary malignancies | Don't know            |
|--------------------------|-----------------------|-----------------------|-----------------------|-----------------------|------------------------|-----------------------|
| Adriamycin (Doxorubicin) | <input type="radio"/>  | <input type="radio"/> |
| Taxol (Paclitaxel)       | <input type="radio"/>  | <input type="radio"/> |
| Oxaliplatin (Eloxatin)   | <input type="radio"/>  | <input type="radio"/> |

---

---

**For how long do you believe oncologists should continue regular follow-up visits to evaluate the health of survivors who have completed active treatment for early stage BREAST or COLON CANCER, assuming they have no evident disease or treatment complications?**

|                      | Duration of treatment | 5 Years               | Indefinitely          | Other                 | Don't know            |
|----------------------|-----------------------|-----------------------|-----------------------|-----------------------|-----------------------|
| Breast cancer        | <input type="radio"/> |
| Colon cancer         | <input type="radio"/> |
| Breast cancer- other |                       |                       | _____                 |                       |                       |
| Colon cancer- other  |                       |                       | _____                 |                       |                       |

---



---

**In your practice, how often do you encounter the following problems when caring for BREAST or COLON CANCER SURVIVORS who have completed active treatments 5 or MORE YEARS AGO?**

**How often is this a problem?**

|                                                                                                                             | Never                 | Rarely                | Sometimes             | Often                 | Always/Almost Always  | NA                    |
|-----------------------------------------------------------------------------------------------------------------------------|-----------------------|-----------------------|-----------------------|-----------------------|-----------------------|-----------------------|
| Patients refuse or do not adhere to recommended care                                                                        | <input type="radio"/> |
| I am not able to order appropriate tests or treatments because of health insurance plan restrictions                        | <input type="radio"/> |
| I order tests or treatments to protect myself against malpractice litigation                                                | <input type="radio"/> |
| I am uncertain about which physician (oncology specialist or PCP) is providing patients' general preventive health care     | <input type="radio"/> |
| I am concerned about duplicated care by the primary care physician and oncology specialist                                  | <input type="radio"/> |
| I am concerned about missed care due to unclear delineation of roles between primary care physician and oncology specialist | <input type="radio"/> |
| Patients request more aggressive cancer surveillance testing than what I would recommend                                    | <input type="radio"/> |
| Patients contact me for problems that should be treated by the oncology specialist                                          | <input type="radio"/> |
| Patients are unable to pay (or lack insurance coverage) for follow-up care                                                  | <input type="radio"/> |
| I don't have adequate knowledge or training to manage my patients' problems                                                 | <input type="radio"/> |

Are there any other problems that are not mentioned above?

Yes  
 No

How often do you encounter these problems that are not mentioned above (Please specify)

\_\_\_\_\_

How often do you think a diagnosis of cancer interferes with care for other co-morbidities such as hypertension and diabetes mellitus for cancer survivors.

- Never
- Rarely
- Sometimes
- Often
- Always/Almost Always
- Don't know



---

---

**Assuming that adequate resources were available to implement any of the care delivery models below, which model do you most prefer to ensure the best possible outcomes for patients who have completed active treatment for early-stage cancer?**

Please select option for cancer survivorship care that you would MOST prefer.

- Primary Care Physician has primary responsibility for cancer-related follow-up care
- Medical Oncologists have primary responsibility for cancer-related follow-up care
- Oncologists and Primary Care Physicians share responsibility for cancer-related follow-up care
- Specialized clinics led by physicians who focus exclusively on cancer survivor care
- specialized clinics, led by Oncology Nurses, NP, PA who focus exclusively on cancer survivor care

Please select your LEAST preferred model for cancer survivorship care.

- Primary Care Physician has primary responsibility for cancer-related follow-up care
- Medical Oncologists have primary responsibility for cancer-related follow-up care
- Oncologists and Primary Care Physicians share responsibility for cancer-related follow-up care
- Specialized clinics led by physicians who focus exclusively on cancer survivor care
- specialized clinics, led by Oncology Nurses, NP, PA who focus exclusively on cancer survivor care

---



---

### III. PHYSICIAN AND PRACTICE CHARACTERISTICS

What is your primary specialty (i.e., the one specialty in which you spend most of your time)?

- General Internal Medicine  
 Family Medicine  
 Other

Other \_\_\_\_\_

Have you received training or instruction regarding the late or long-term effects of cancer treatment that cancer survivors may experience over time?

- No  
 Yes, somewhat  
 Yes, In detail

In the PAST 5 YEARS, from where have you received training or instruction regarding the late or long-term effects of cancer treatment that cancer survivors may experience over time?

- CME activities  
 Professional meetings or conferences  
 Postgraduate medical training (e.g., residency, fellowship)  
 Medical School  
 Medical Journals  
 Colleagues  
 Other (Please Specify)  
 None of the above

Other \_\_\_\_\_

Are you currently involved with teaching medical students and/or residents?

- Yes  
 No

What type of medical record system does your primary practice use?

- Paper records and charts  
 Partial electronic medical records  
 In transition from paper to full electronic medical  
 Full electronic medical records

Is your primary site of practice

- Hospital-based primary care  
 Community-based primary care  
 A non-SFHN primary care health center

During a typical week, approximately how many patients do you see in your primary practice location?

- 25 or fewer  
 26-50  
 51-75  
 76-100  
 101-125  
 126 or more

What percentage of your patients have limited English proficiency or require an interpreter

- 0%  
 1-25%  
 25-50%  
 50-75%  
 75-100%

What percentage of your patients are uninsured?

- 0%  
 1-5%  
 6-25%  
 26-50%  
 51-75%  
 76-100%  
 Don't know

What percentage of your patients have Medicaid (MediCal)?

- 0%
- 1-5%
- 6-25%
- 26-50%
- 51-75%
- 76-100%
- Don't know

Are you of Hispanic origin or ancestry?

- Yes
- No

Which do you feel best describes your race or ethnicity?

- American Indian/Alaska Native
- Asian
- Native Hawaiian or other Pacific Islander
- Black or African-American
- White

Are you a

- MD/DO
- Advanced practitioners NP/PA
- Resident/Fellow

Please write the name of the clinic in the box where you provide primary care.

If more than one site , please write the location where you spend majority of your time.

---

Other

---

Are there any additional thoughts, issues or needs you wish to share? Please feel free to write in the space as we welcome your feedback.

---
